# **DNA methylation plays a role on *in vitro* culture induced loss of virulence in *Botrytis cinerea***

James Breen<sup>1,2</sup>, Luis Alejandro Jose Mur<sup>3</sup>, Anushen Sivakumaran<sup>3</sup>, Aderemi Akinyemi<sup>3</sup>,  
Michael James Wilkinson<sup>3</sup>, Carlos Marcelino Rodriguez Lopez<sup>4\*</sup>

<sup>1</sup>Robinson Research Institute, University of Adelaide, Adelaide SA 5005

<sup>2</sup>University of Adelaide Bioinformatics Hub, School of Biological Sciences, University of  
Adelaide, Adelaide SA 5005

<sup>3</sup>Pwllpeiran Upland Research Centre, Institute of Biological, Environmental and Rural  
Sciences, Edward Llywd Building, Penglais Campus, Aberystwyth, Ceredigion, SY23 3FG,  
UK.

<sup>4</sup>Environmental Epigenetics and Genetics Group, School of Agriculture, Food and Wine,  
Waite Research Precinct, University of Adelaide, PMB 1, Glen Osmond, SA 5064, Australia.

*\*Corresponding author*

## Abstract

Pathogenic fungi can lose virulence after protracted periods of culture but little is known of the mechanisms regulating this. Here we assess whether DNA methylation could play a role in this phenomenon by the methylome analysis of virulent and reduced virulence derivative cultures of *Botrytis cinerea*, and identify the genes/genomic regions affected by these epigenetic modifications. Virulence declined during the eight months culture and recovered after one fungal generation on *A. thaliana*. Methylation-sensitive amplified polymorphisms show that epi/genetic variation followed virulence changes during culture. Whole genome sequencing showed no significant genetic changes during culture. Conversely, bisulfite sequencing showed significant changes both on global and local methylation patterns. We suggest that virulence is a non-essential plastic character regulated by DNA methylation during protracted *in vitro* culture. We propose DNA methylation as a regulator of the high virulence/low virulence transition in *B. cinerea* and as a potential mechanism to control pathogenicity.

## Introduction

*Botrytis cinerea* is a pathogenic ascomycete responsible for grey mould on hundreds of dicotyledonous plant species and is able to feed on many different plant tissue types (1). It is estimated that the disease causes annual losses of up to \$100 billion worldwide (2). The wide variety of host tissues and species implies that *B. cinerea* is highly plastic in host specificity with a large ‘arsenal of weapons’ at its disposal. *B. cinerea* is well documented to be a capable saprotroph and necrotroph with genetic types showing a trade-off between saprotrophic and necrotrophic capabilities (3). As with other pathogens, *B. cinerea* undergoes transcriptional and developmental regulation to govern the outcome of interactions with its host plants. However, changes in virulence levels are not under strict developmental control

and have, for example, also been observed to alter during protracted *in vitro* culture of *B. cinerea* (4). In fact, pathogenic fungi are notorious for losing virulence when successively subcultured *in vitro*. Degenerated cultures of this kind have been reported in a wide range of pathogenic fungi (5) but very little is known about why cultures degenerate in virulence. Different factors have been described as possible causes of the observed loss of virulence during culture including dsRNA mycoviruses (6,7), loss of conditional dispensable chromosomes (8,9) or culture-induced selection of nonvirulent strains. However, one characteristic common to almost all *in vitro*-derived non-virulent fungal strains is that their virulence is restored after one passage on their host (5). If attenuated strains recover virulence, then loss of virulence cannot be explained by mycoviruses infection or chromosome loss. Furthermore, fungal strains in culture lose virulence irrespective of whether the parent culture was derived from a single spore or multi-spore colony (5), suggesting that there cannot be a culture induced selection of nonvirulent strains.

The reversibility of this aspect of the observed phenotype comes in response to changes in the growing environment and so could be viewed as phenotypic plasticity (10). In 1942 C.H. Waddington (11) first proposed the term epigenotype to describe the interface between genotype and phenotype. Since then, a large body of research has been carried out to better understand the role of epigenetic regulatory systems in shaping the phenotype of higher organisms surviving in fluctuating environments (12,13). Epigenetic processes operate in a number of ways to alter the phenotype without altering the genetic code (14). These include DNA methylation, histone modifications, and mRNA editing and degradation by noncoding RNAs. Such processes are intimately entwined and often work in a synergistic way to ultimately achieve changes in phenotype (15). DNA methylation, and more specifically cytosine methylation (i.e. the incorporation of a methyl group to carbon 5 of the cytosine

pyrimidine ring to form 5-methylcytosine (5-mC)) is the most studied epigenetic mechanism. It is present across many eukaryotic phyla, including plants, mammals, birds, fish, and invertebrates and provides an important source of epigenetic control for gene expression (16). In plants and animals, DNA methylation is known to be involved in diverse processes including transposon silencing, X-chromosome inactivation, and imprinting (17). In fungi, several studies have showed changes in overall 5-mC content during development in *Phymatotrichu omnivorum* (18) and *Magnaporthe oryzae* (19). Global patterns in DNA methylation has been previously shown to dramatically change in lichen fungi species when exposed to the algal symbiont (20). Whole-methylome sequencing in Ascomycetes has shown that this group of fungi present heavily methylated silent repeated loci and methylated active genes. Zemach et al, (21) reported a correlation between gene body methylation and gene expression levels in *Uncinocarpus reesii*. More recently, Jeon et al., (19) ascribed a developmental role for DNA methylation in *M. oryzae*. In this pivotal paper, it was demonstrated that DNA methylation density in and around genes changes during development, and that transcript abundance is negatively affected by DNA methylation upstream and downstream of ORFs while gene body methylation is linked to enhanced expression. Recent years have seen a dramatic increase in the depth of understanding of how epigenetic control mechanisms operate during plant/pathogen interactions (2,22). However, little is known of the possible role played by DNA methylation processes related to virulence in fungal plant-pathogen interactions. The authors are specifically aware of no studies describing DNA methylation dynamics associated with protracted periods of culture and the associated loss of virulence from a pathogenic fungus. In this paper, we seek to explore possible links between erosion of pathogenicity from *B. cinerea* during protracted *in vitro* culture and dynamics of DNA methylation across their genomes. We used Methylation Sensitive Amplified Polymorphisms (MSAPs) (23) to provide a preliminary survey of

methyloome flux associated with gradual changes to *B. cinerea* pathogenicity that occurs during protracted *in vitro* culture. We next sought to identify candidate regions whose change in methylation status may be specifically associated with loss of virulence. For this, we identified Differentially Methylated Regions (DMRs) associated to the loss of pathogenicity during *in vitro* culture using sodium bisulfite whole genome sequencing of from different times in culture.

## Results

### Pathogenicity analysis of *Botrytis cinerea*

All isolates obtained from all culture time points produced lesions on *A. thaliana* but they varied in their severity (Figure 1A). As *B. cinerea* was successively cultured, the disease scores imposed by each inoculation progressively decreased over the eight-month period, denoted as time 0 to time 8 months (i.e. T0-T8) (Figure 1B). The apparent loss of virulence with time in culture becomes significant from 3 months (T3) onwards (T-Test  $P < 0.05$ ) (Figure 1B). The disease scores for the T8P challenge did not differ significantly from those for those at T0 culture time, suggesting that virulence had recovered following a single passage through a plant (Figure 1B). Conversely, T8 virulence scores were significantly lower than those obtained from T0 to T5 and also than T8P (T-Test  $P < 0.05$ ) (Figure 1B). Fungal DNA content within the infected areas of the leaf was measured by quantitative PCR (24) to confirm that *in planta* fungal growth was greater using inoculum from time points T0 and T8P than from T8. Infected leaves with T0 and T8P cultures did not show significant differences in fungal DNA content (Figure 1C). However, both showed significantly higher levels of fungal DNA (T-Test  $P < 0.05$ ) when compared to those infected using T8 cultures (Figure 1C).

## Analysis of genetic and epigenetic variance during culture using MSAPs

MSAP profiles generated a total of 74 loci (22 unique to *HpaII*, 4 unique to *MspI* and 48 common to both restriction enzymes) for the 112 samples of eight *B. cinerea* culture times used in this study (T2-T8P). Multivariate analysis of the MSAP profiles revealed that the global methylation profiles of *B. cinerea* became progressively more dissimilar to the first time point analysed (T2) with increasing culture age (Figure 2). Both, PCoA (Figure 2A and C) and PhiPT values (Figure 2B) showed higher levels of culture-induced variability when using *HpaII* than when using *MspI*. PCoA shows that samples cultivated for 3, 4, 5, 6, and 7 months occupied intermediate Eigenspace between samples cultivated for 2 and 8 months (Figure 2C). Furthermore, a partial recovery of the MSAP profile was observed on samples cultured for 8 months after one fungal generation on the host plant (T8P) (Figure 2C). Calculated PhiPT values between each time point and T2 samples show a progressive increase in methylome distance with time in culture when samples were restricted with both enzymes. Analysis of Molecular Variance (AMOVA) analysis shows that the calculated PhiPT values were significantly different ( $P < 0.05$ ) between T2 and time points T6, T7, T8 and T8P when using *MspI* and T7, T8 and T8P when using *HpaII* (Figure 2B). Mantle test analysis showed significant correlations between changes in virulence between culture time points and the pairwise distances calculated from MSAP profiles generated using *MspI* ( $R^2 = 0.316$ ;  $P = 0.005$ ) and *HpaII* ( $R^2 = 0.462$ ;  $P = 0.002$ ) (Figure S1).

## *B. cinerea* genome resequencing

To determine if the *in vitro* culture variability detected using MSAP analysis could be attributed to genetic changes, pooled, sequenced and compared DNA extractions from 3

independent cultures from two time points (1 month (T1) and 8 months (T8) in culture) to the Broad Institute's *B. cinerea* B05.10 reference genome sequence (<http://www.broadinstitute.org/scientific-community/science/projects/fungal-genome-initiative/botrytis-cinerea-genome-project>). Both samples were sequenced to an average depth of 37.47x (35.64x for the 1-month culture and 39.30x for the 8-month culture) with an average of 80% of reference bases being sequenced to a depth greater than 10x. After filtering for coverage greater than 10x and >30 variant quality, 186,275 variants were identified compared to the B05.10 reference, with 174,456 variants being shared between both time points (i.e. T1 = T8). Additional filtering was used to remove multi-allelic variants, variants with missing data in one sample and variants with an observed allele frequency less than 0.5 (25). This filtering reduced the number of non-shared variants to 2,331, of which 1,030 (44%) were small insertions and deletions (INDELs) and 1,301 (56%) SNPs. Of the 2,331 filtered variants analysed, 454 were located within genes including: 251 synonymous variants, 198 non-synonymous mutations (193 causing missense variations and 5 causing premature stop codons (non-sense mutations) all located in genes with unknown functions (BC1G\_07064, BC1G\_08869, BC1G\_08189, BC1G\_12710 and BC1G\_01150). An additional 5 variants that altered predicted splice junctions were also identified.

We next focused the search for variants within the sequence of 1,577 *B. cinerea* genes with known function including: secondary metabolism (i.e. sesquiterpenecyclases, diterpenecyclases, paxillin-like enzymes, fusiccocin-like enzymes, Phytoene synthases, non-ribosomal peptide synthetases, polyketides synthases, chalcone synthases, DiMethylAllyl Tryptophan Synthases) (26), conidiation (26), sclerotium formation (25), mating and fruit body development (26), apoptosis (26), housekeeping (26), signalling pathways (G protein-coupled receptors, MAP kinases, heterotrimeric G proteins, cAMP signalling components and Ca<sup>2+</sup>-related signalling) (26) and virulence *senso lato* genes (147 genes were duplicated,

i.e., present in more than one category). The virulence *sensu lato* genes included: 12 appressorium-associated genes (26), 17 virulence *sensu stricto* genes (27) and 1,155 plant cell wall disassembly genes (CAZyme genes) (28). Of the 1,577 tested genes, 68 (4.3%) contained one or more variants between T1 and T8 (See Table 1 and Supplementary Table 1 for a comprehensive list of genes with variants).

# **Characterisation of DNA Methylation changes by whole-genome bisulfite sequencing**

To validate and better characterise the DNA methylation changes observed during culture of *B. cinerea* using MSAP analysis, we generated genome-wide DNA methylation maps across the fungal genome by conducting whole-genome bisulphite sequencing (WGBS) from triplicated genomic DNA extractions from mycelia of two different culture ages (T1 and T8) and from samples culture for eight months and then inoculated onto an *A. thaliana* plant (T8P). WGBS of these samples yielded 187.5 million reads ranging from 12.61 to 34.05Gbp per sample after quality filtering. Mapping efficiency of each replicate ranged from 54.3 to 67.6%, resulting in samples that generated between 33 and 55x coverage of the 42.66Mbp genome (Supplementary Table 2). This is the highest genome coverage achieved to date for any fungal species after bisulfite sequencing. On each sample, we covered over 91-93% of all cytosines present in the genome (Supplementary Table 2), with all samples having at least 81% of cytosines covered by at least four sequencing reads, allowing methylation level of individual sites to be estimated with reasonable confidence.

Bisulfite sequencing identified an average of 15,716,603 mC per sample, indicating an average methylation level of 0.6% across the genome as a whole, with varying levels in individual samples (Supplementary Table 2). The most heavily methylated context was CHH



followed by CG and CHG (where H is A, C or T) (Supplementary Table 3). Although global levels of mC did not significantly change with culture time, methylation in the rarer CG and CHG contexts increased significantly (T-test,  $p=0.0008$  and  $0.0018$ ) between 1 and 8 months in culture (Figure 3A). Both types of methylation showed a decreasing trend (not significant) on samples recovered from eight month old cultures inoculated onto *A. thaliana* (T8P) (Figure 3A). Analysis of local levels of DNA methylation across the largest *B. cinerea* contig (Supercontig 1.1) showed that DNA methylation is not evenly distributed but locally clustered (Figure 3B-D). Observed clustering patterns were similar in all analysed samples (Figure 3B-D).

We next investigated the fine distribution of DNA methylation across genic and regulatory regions by surveying the location and density of mCs on all *B. cinerea* genes (exons and introns), and promoter regions, defined here as 1.5 kb upstream of the Transcription Starting Site (TSS). Among these, mC levels increased between 1,000 and 500bp upstream of TSS. This was followed by a sharp decrease and increase in methylation before and after the start of the coding sequence (Figure 4). When the different time points were compared for these same global methylation levels were higher on T8P samples (Figure 4), in parallel with that observed at a whole-genome level (Figure 3A).

The same methylation density analysis was then carried out for five loci corresponding to four housekeeping genes in *Botrytis* (i.e., G3PDH (Glyceraldehyde 3-phosphate dehydrogenase) (BC1G\_09523.1); HSP60 (Heat Shock Protein 60) (BC1G\_09341.1); Actin (BC1G\_08198.1 and BC1G\_01381.1) and Beta Tubulin (BC1G\_00122.1). All five Loci

present low levels of DNA methylation in every context and no changes in DNA methylation were observed between time points (i.e., T1, T8 and T8P) (Data not shown).

Finally, methylation density was analysed on 131 genes encoding putative CAZymes secreted by *B. cinerea* upon plant infection (Supplementary Table 4) (28). As a whole, these genes showed the same methylation pattern as described above for all *B. cinerea* genes with an increase in methylation upstream of the TSS (Figure 5A). More interestingly, these genes showed higher levels of methylation after 8 months in culture than at T1 and at T8P. This observed increase in global methylation on T8 samples was due to an increase on the CHG and CG (Figure 5B-C) contexts. Conversely, CHH (Figure 5D) showed higher levels of methylation on the T8P samples, following the general trend observed both at a whole genome level (Figure 3A) and by all *B. cinerea* genes (Figure 4).

# **Detection of culture induced DMRs**

We sought to identify loci exhibiting DMRs between culture times (T1, T8 and T8P) by comparing methylation levels across the whole genome of all samples using a sliding window analysis, carried out in swDMR (<https://code.google.com/p/swdmr/>). The significance of the observed DMRs was determined using a three sample Kruskal-Wallis test between T0, T8 and T8P. Analysis of DMR length distribution showed DMRs sizes ranging from 12 to 4994bp (Figure 6A). The sliding window approach identified 2,822 regions as being significantly differentially methylated in one of the samples compared to the other two for all mCs (Table 2, Supplementary Table 5). Overall methylation levels of DMRs decreased in all contexts (CG, CHG and CHH) as time in culture progressed (from T1 to T8) but this was followed by a recovery of DNA methylation levels after culture on *A. thaliana* (T8P) (Figure

6b). However, it is worth noting that T8 showed a larger number of outlier DMRs (greater than two standard deviations away from the mean) that exhibited significantly higher levels of methylation than the average (Figure 6B).

When studied individually, changes in methylation levels within DMRs between samples presented two main pattern types (Table 2, Supplementary Table 5): **1.** 57.3% of the detected DMRs showed a recovery pattern inoculation on *A. thaliana* such that there was no difference between T1 and T8P samples but methylation levels diverged significantly in T8 ( $T1=T8P < T8$  (FDR < 0.01))). **2.** The remaining DMRs showed a non-recovery pattern (i.e.,  $T1 > T8P$  (FDR < 0.01))). Two subtypes were found for DMRs showing a DNA methylation recovery pattern: **1.** DMRs showing an increase in methylation with time in culture ( $T1=T8P < T8$  (26.82%)) (defined as Type 0 hereafter) and **2.** DMRs showing a decrease in methylation level with time in culture ( $T1=T8P > T8$  (30.47%)) (Type 2). Equally, non-recovery DMRs can be divided into two categories: **1.** DMRs showing a decrease in methylation level with time in culture and no change in methylation level following inoculation on *A. thaliana* ( $T0 > T7 = T7P$  (16.02%)) (Type 1a) and **2.** DMRs not showing changes in methylation level during culture but an increase in methylation level after inoculation on *A. thaliana* ( $T0 = T7 < T7P$  (26.68%)) (Type 1b). Curiously, no DMRs were observed to show a progressive increase in methylation level with time in culture and no change in methylation level after inoculation on *A. thaliana* ( $T1 < T8 = T8P$ ).

The vast majority (84.5%) of detected DMRs overlapped with 3,055 genic regions in the *B. cinerea* genome (Table 3) while 438 (15.5%) mapped to intergenic regions. Almost all of the genes implicated (98%) included DMRs within the gene body itself, with a majority (53.9%) also overlapping with the promoter region (Table 3, Supplementary Table 6). The same analyses were carried out to detect DMRs for CG, CHG and CHH contexts, identifying 70,

82 and 1,248 DMRs respectively for each context (Table 3, Supplementary Table 5). Of these, 91.4% (CG), 89.0% (CHG) and 85.2% (CHH) overlapped with 68, 84 and 1,339 genes respectively (Table 3, Supplementary Table 6).

Finally, we conducted a search for DMRs overlapping with 1,577 *B. cinerea* genes with known targeted functions that was carried out in the resequencing section above. Of these, 478 genes (30.3%) overlapped with one or more detected DMRs (See Table 1 and Supplementary Table 7 for a comprehensive list of genes overlapping with DMRs).

## Discussion

### **Culture induced changes in *B. cinerea* MSAP profiles and in virulence are simultaneous and reversible.**

In accordance with previous reports (6–9), we found that virulence of *B. cinerea* cultures significantly decreases with culture age, and that virulence levels recover after one passage on *A. thaliana* (5). Concurrent with these changes, we observed that MSAP profiles showed a similar progressive increase in deviation from the starter culture profiles. This observed accumulation of somaclonal variation as culture progressed, showed a positive linear correlation with the observed changes in virulence. This correlation is consistent with previous reports of accumulative genetic/methylome change for other species when similarly exposed to prolonged periods of culture (15,29). Our observations also accord with the high levels of somaclonal variability arising during *in vitro* growth of phytopathogenic fungi, which seemingly depresses the level of virulence of the culture isolates (30). Whilst the source of the increased variation during protracted culture could have a genetic or epigenetic cause (both mutation and methylation perturb MSAP profiles), reversal of virulence

phenotype after a single passage of the cultured fungus on *A. thaliana* (T8P) strongly implies that a plastic, epigenetic mechanism drives the observed change in virulence. This is most easily explained if culture alters the methylation status of the genome and this in turn perturbs virulence. For this hypothesis to hold, it is important to establish a link between changes in the methylome on genes known to be implicated in virulence. This requires a more precise approach to describing the global changes in methylome patterning and mutation.

# **Sequence variants do not explain loss of virulence during protracted culture of *B. cinerea***

Whole genome resequencing of six DNA samples taken at two time points (one month and eight months) was carried out to monitor for mutational change during the extended period of *B. cinerea* culture. This yielded a total of 2,331 sequence variants of which 454 mutations occurred within genes, of which only 198 were non-synonymous mutations (193 causing missense variations and five causing premature stop codons (non-sense mutations). For genes with unknown function, it is difficult to implicate these changes as being involved in the loss of virulence observed during culture. We therefore screened specifically for the appearance of genetic variants among 1,577 *B. cinerea* genes with known function of which only 4.3% showed variants. Of these, just eight genes (0.5% of the total) included sequence variants that were not silent mutations, or led to a conservative missense codon or a synonymous codon. Of the 1184 genes known to be associated to virulence, just six (0.5%) included a sequence variant that could conceivably affect the virulence phenotype. All six genes were plant cell wall disassembly genes (CAZyme genes (31)). The low level of detected genetic variants and specially the lack of variants on virulence *sensu stricto* genes induced by protracted *in vitro* culture again supports that genetic mutation is not the primary cause of the erosion of

virulence during in vitro culture of *B. cinerea* a finding reported previously for other species (25).

# ***In vitro* culture affects whole-genome methylation patterns in *B. cinerea***

Taken collectively, our results suggest that changes in DNA methylation at a genome level are more likely than mutation to be causally linked to the observed loss of virulence during *in vitro* culture. We sought to establish a more direct link between methylome changes and gene activity by sequencing of the methylomes of nine samples from three culture time points (T1, T8 and T8P). All genomes presented similarly low levels of DNA methylation (0.6%) as reported for other fungal species (21). DNA methylation was not evenly distributed across contigs but clustered into certain regions following a mosaic pattern (32), with higher levels of methylation in regions with lower abundance of genes. Such clustering patterns have been previously observed in pathogenic fungi linked to transposable elements rich and gene poor regions (19), and have been shown to be dynamic following fungal development (19). The observed clustering patterns were similar in all analysed culture time points suggesting that the methylation changes detected here are not associated to progression in development occurred during culture. However, global methylation levels varied with sequence context (with CHH > CG > CHG) and time in culture. In brief, global methylation levels on CGs and CHGs increased significantly between 1 (T1) and 8 (T8) months in culture. In both sequence contexts, following inoculation on *A. thaliana*, T8P cultures had lost some of the methylation accumulated during culture and were no longer significantly different to the virgin inoculums. This observed change in methylation levels supports MSAP results that showed an increase of methylome variation with time in culture that was only partially recovered in T8P cultures.

337

338 Previous genome-wide studies have shown that gene methylation in the monophyletic  
339 Ascomycota phylum varies greatly. For example, in *Neurospora crassa* DNA methylation is  
340 not found in gene bodies. However gene body methylation has been reported in other species  
341 such as, *Candida albicans*, *Uncinocarpus reesii* and *Magnaporthe oryza* (16,19,21) while  
342 promoter methylation has only been reported in *M. oryza* (19). Analysis of the effect of  
343 methylation distribution and density on gene expression has shown that gene body  
344 methylation has positive effects on gene expression (19,21) while promoter methylation has a  
345 negative effect (19). Our analysis of methylation distribution in *B. cinerea* genes showed an  
346 increase in methylation approximately 800bp upstream of the TSS followed by a sharp  
347 decrease at the TSS as shown by Jeon et al (2015) in *M. oryza* mycelia. Our results showed a  
348 second increase in methylation density after the TSS indicating that at least some *B. cinerea*  
349 genes contain gene body methylation.

350

351 Comparative analysis between culture time points showed that when all *B. cinerea* genes  
352 were analysed collectively there were no changes in DNA methylation with time in culture  
353 (T1=T8). However, while DNA methylation on house-keeping remained stable between  
354 culture time points, CAZyme genes showed an increase in promoter methylation with time in  
355 culture (i.e. T1<T8). Moreover, CAZyme genes showed a recovery of the original  
356 methylation levels after a single passage on *A. thaliana* (i.e. T1=T8P<T8). Conversely, all *B.*  
357 *cinerea* genes analysed collectively showed an increase in methylation, similar to that  
358 observed at a whole genome scale (T8<T8P). Global methylation levels on the CAZyme gene  
359 in promoter showed a negative correlation with virulence levels. This observed increase in  
360 promoter methylation on T8 samples seems to be due to an increase on the CHG and CG  
361 contexts. Conversely, global methylation levels on the CAZyme gene bodies showed a

positive correlation with virulence levels (T1=T8P>T8) that seem to be due to changes on the CHH context. CAZyme genes encode proteins that breakdown, biosynthesise and modify plant cell wall components and are highly expressed during plant invasion in *B. cinerea* (28,31). This gene family, should therefore, be readily accessible to the transcriptional machinery in the virulent form of pathogenic fungi. Interestingly, our results show a correlation between virulence levels in T1, T8 and T8P samples and a methylation features in CAZyme genes that have positive effects on gene expression, i.e. high gene-body methylation (19,21) and low promoter methylation (19) in high virulence cultures (T1 and T8P) and the opposite in the low virulence culture (T8).

# **Culture induced differentially methylated regions are reversible and mirror changes in virulence**

To determine the significance of the observed changes in DNA methylation between culture time points we performed an analysis of regional differential methylation identifying 2,822 significant DMRs in one time point compared to the other two for all mCs. Globally, DMRs show a decrease in methylation level between T1 to T8 in all contexts (CG, CHG and CHH), followed by a recovery of DNA methylation levels after culture on *A. thaliana* (T8P). This seem to contradict the observed changes in global DNA methylation levels which showed an increasing trend (T1 < T8 < T8P). However, T8 showed a larger number of outlier DMRs showing levels of methylation significantly higher than the average, suggesting that not all predicted DMRs followed the same pattern of demethylation followed by re-methylation. Furthermore, similar differences between global and local DNA methylation levels have been reported previously in different organisms (19,33). Interestingly, regional changes in DNA methylation have been previously associated to the developmental potency of fungal cells (19). In their work, Jeon et al (2015) showed how fungal totipotent cells (mycelia) present



higher global methylation levels while cells determined to host penetration (appresoria) present a higher number of genes with methylated cytosines but lower global levels of DNA methylation. More pertinently, 68.3% of the culture induced DNA methylation changes (i.e. Type 0, 2 and 1a, which accounts for 57.3% of the total detected DMRs) showed a recovery pattern after a single round of inoculation onto *A. thaliana*. This suggests that a majority of the DNA methylation changes accumulated during *in vitro* culture are reset to their original state after a single passage on the host. Interestingly, 26.7% of the observed changes (Type 1b) were not induced by *in vitro* culture but by the host. This highlights, as shown before in other pathogens (2,34,35), the importance of epigenetic mechanisms in host/pathogen interactions, and the potential implication of dynamic DNA methylation as regulator of phenotypic plasticity in response to nutrient availability and interaction with the host (36).

Of the total detected DMRs for all mCs 84.5% overlapped with one or more genes suggesting that the great majority of *in vitro* culture induced DNA methylation changes occur in genic regions. This overlap of individual DMRs with one than more gene is probably partially due to the small average size of intergenic regions (778 to 958bp) and genes (744 to 804 bp) in *B. cinerea* (26). Analysis of DMRs overlapping with 1,577 genes with known function revealed that 30.3% of the total overlapped with DMRs. Ten gene functional groups (house-keeping, apoptosis, conidiation, mating and fruit body development, secondary metabolism, signaling, sclerotium formation, appressorium formation, virulence and CAZYme genes) were screened for overlapping DMRs. House-keeping genes did not overlap with any DMRs while genes associated to apoptosis and conidiation showed the higher percentage of overlapping with DMRs (40.0 And 37.5% respectively). Remarkably, both biological processes have been previously shown to be affected by DNA methylation (19,37,38). Moreover, 98% of these DMRs overlapped, at least partially, with gene bodies while 2.4% and 15.6% overlapped only

with promoters or gene bodies respectively. Taken collectively, this indicates that *B. cinerea* genes in general and gene bodies in particular are prone to environmentally-induced change to their methylation status. When DMRs were defined using each DNA methylation context independently (i.e. CG, CHG and CHH), the large majority (89.1% of all DMRs and 89.9% of those overlapping with genes) were linked to changes on the CHH context, implying that DMRs in this context are the reason for the observed changes in detected CAZyme gene body methylation associated to higher levels of virulence.

## Conclusion

In this study, we present, to our knowledge, the first proof that global and local changes in DNA methylation are linked to virulence changes during *in vitro* culture. Furthermore, here we present the first single base resolution DNA methylome for the plant pathogen *B. cinerea*. Our results suggest that protracted culture of *B. cinerea* induces a hypermethylated, low pathogenic form adapted to the absence of the host or the abundance of nutrients in the culture media. It is tempting to speculate that the observed change in global and local levels of DNA methylation during *in vitro* culture could be part of a mechanism that confers plasticity to the *B. cinerea* genome to adapt to different environments. Butt et al (2006) proposed that *in vitro* culture induced loss of virulence could be the reflexion of an adaptive trait selected to promote energy efficiency, i.e. by turning off virulence genes in the absence of the host or in environments rich in freely available nutrients. The authors also proposed that this trait could become maladaptive since it restricts the pathogen to a saprophytic mode (5). Environmentally induced epigenetic adaptive changes have been predicted to have the potential to induce evolutionary traps leading to maladaptation (39,40). However, in this case the complete reversibility of the reduced virulence phenotype induced by protracted culture suggests that this might not be the case.

In our view, the availability of an increasingly large number of sequenced genomes and methylomes from pathogenic fungi, together with our ability to decipher the associations between changes in DNA methylation and virulence, will stimulate our understanding of the mechanisms involved in the control of pathogenicity on these species. Moreover, the analysis of DMRs could potentially be used to predict gene function in non-model fungal species or even to predict pathogenicity in wild strains. More importantly, if the epigenetic regulation of the transition between the virulent and non-virulent states that we propose here applies broadly to other pathogenic fungi, our findings will open the door to a new type of non-lethal fungicide aimed at maintaining pathogenic fungi as saprotrophic that by its nature would reduce the appearance of resistant strains.

## Materials and Methods

### *Botrytis cinerea* culture and inoculation

7 *Botrytis cinerea* cultures (IMI169558 isolate (41)) were initiated from a single frozen inoculum and cultured and harvested for 32 weeks as stated in Johnson et al (42). After 4 weeks in culture (T0) the initial culture was subcultured to 7 plates containing fresh medium. Mycelium from each plate was subsequently subcultured every 4 weeks (1 month hereafter) to fresh medium. A mycelium sample was taken for DNA extraction from all replicates and conidia harvested for virulence analysis (42) from five replicates at every subculture. For assessments of infection phenotypes, single leaves from five *Arabidopsis thaliana* Col 0 plants (leaf stage 7 or 8 as defined by (43)) were inoculated with 5 µl of spore suspension collected at each subculture time (T0-T8), pipetted onto the adaxial surface of the leaf. Controls were inoculated with PDB. Finally, after the T8 challenge, *B. cinerea* was isolated

from the infected areas, cultured and immediately used to challenge *A. thaliana* plants to test virulence recovery (Figure S2) (T8P). Plants remained under Stewart Micropropagators to sustain a relative humidity of 50–80% and lightly watered every 24 h.

## Plant material

*A. thaliana* Col-0 seeds were obtained from the Nottingham Arabidopsis Stock Centre (NASC). Plants were cultivated as stated in (44) in Levington Universal compost in trays with 24-compartment inserts. Plants were maintained in Conviron (Controlled Environments Ltd) growth rooms at 24 C with a light intensity of 110  $\mu\text{mol m}^{-2} \text{s}^{-2}$  and an 8 h photoperiod for 4 weeks. For ease of treatment, plants were transferred to Polysec growth rooms (Polysec Cold Rooms Ltd, UK; <http://www.polysec.co.uk/>), maintained at the same conditions.

## DNA isolation

126 *B. cinerea* genomic DNA (gDNA) extractions were performed (from 2 replicates of each of the 7 plates at *in vitro* time point (T1-T8) and from of the last time point culture transplanted onto to *A. thaliana* (T8P)) using the DNeasy 96 Plant Kit (Qiagen, Valencia, CA) and the Mixer Mill MM 300 (Retsch, Germany). Isolated DNA was diluted in nanopure water to produce working stocks of 10  $\text{ng} \cdot \mu\text{l}^{-1}$ . DNA from *B. cinerea* inoculated *A. thaliana* was extracted from five leaf samples at each time point of using a DNeasy Mini Kit (Qiagen, Valencia, CA) and the Mixer Mill MM 300 (Retsch, Germany). DNA samples were diluted to 1  $\text{ng} \cdot \mu\text{l}^{-1}$  nanopure water.

## Scoring *B. cinerea* lesion phenotypes

Disease lesions were assessed 3 days post inoculation. A weighted scoring method was used to categorize *B. cinerea* lesion phenotypes (45). High virulence symptoms (water-soaking, chlorosis, and spreading necrosis) were conferred a range of positive scores and the resistant symptoms (necrosis limited to inoculation site) were given negative scores (Figure 1A). A weighted score was produced arithmetically from the lesion scores of replicates. Inoculated *A. thaliana* leaves at T0, T8 and T8P were collected 3 days after inoculation for estimation of *in planta* fungal development by quantitative PCR (Figure S2).

### **Estimation of *in planta* fungal growth by quantitative PCR**

Quantitative real-time PCR (qPCR) reactions (25 µl) were prepared by mixing 10 µl DNA solution with 12.5 µl of SYBR™ Green Mastermix (Applied Biosystems, UK) and primers (to a final concentration of 300 nM). Primer for Arabidopsis to generated a 131 bp amplicon of the Shaggy-kinase-like gene (ASK) (iASK1: CTTATCGGATTTCTCTATGTTTGGC; iASK2: GAGCTCCTGTTTATTTAACTTGTACATACC). Primers for *B. cinerea*. (CG11: AGCCTTATGTCCCTTCCCTTG; CG12: GAAGAGAAATGGAAAATGGTGAG to generated a Cutinase A gene 58 bp amplicon (24). qPCRs were carried out using a Bio-Rad ABI7300 thermocycler amplifying using the following conditions: 15 min at 95 °C followed by 50 cycles of 95 °C for 15 s, 58 °C for 30 s and 72 °C for 1 min. This was followed by a dissociation (melting curve), according to the software procedure. Serial dilutions of pure genomic DNA from each species were used to trace a calibration curve, which was used to quantify plant and fungal DNA in each sample. Results were expressed as the CG11/iASK ratio of mock-inoculated samples.

### **MSAP procedure**

508 We used a modification of the MSAP methods (46,47) to reveal global variability in CG  
509 methylation patterns between *B. cinerea* samples. A total of 14 samples per time point (T1 to  
510 T7P) were analysed (2 replicated DNA extractions per culture plate). For each individual  
511 sample, 50ng of DNA were digested and ligated for 2 h at 37°C using 5U of *Eco*RI and 1U of  
512 *Msp*I or *Hpa*II (New England Biolabs), 0.45 µM *Eco*RI adaptor, 4.5 µM *Hpa*II adaptor  
513 (Supplementary Table 8 for oligonucleotide sequences) and 1U of T4 DNA ligase (Sigma) in  
514 11 µl total volume of 1X T4 DNA ligase buffer (Sigma), 1µl of 0.5M NaCl, supplemented  
515 with 0.5 µl at 1mg/ml of BSA. Enzymes were then inactivated by heating to 75°C for 15 min.  
516 Following restriction and adaptor ligation there followed two successive rounds of PCR  
517 amplification. For preselective amplification, 0.3 µl of the restriction/ligation products  
518 described above were incubated in 12.5 µl volumes containing 1X Biomix (Bioline, London,  
519 UK) with 0.05 µl of Preamp *Eco*RI primer and 0.25 µl Preamp *Hpa*II/*Msp*I (both primers at  
520 10 uM) (Supplementary Table 8) supplemented with 0.1 µl at 1mg/ml of BSA. PCR  
521 conditions were 2 min at 72°C followed by 30 cycles of 94°C for 30 s, 56°C for 30 s and  
522 72°C for 2 min with a final extension step of 10 min at 72°C. Selective PCR reactions were  
523 performed using 0.3 µl of preselective PCR reaction product and the same reagents as the  
524 preselective reactions but using FAM labelled selective primers (E2/H1; Supplementary  
525 Table 8). Cycling conditions for selective PCR were as follows: 94°C for 2 min, 13 cycles of  
526 94°C for 30 s, 65°C (decreasing by 0.7°C each cycle) for 30 s, and 72°C for 2 min, followed  
527 by 24 cycles of 94°C for 30 s, 56°C for 30 s, and 72°C for 2min, ending with 72°C for 10  
528 min. Fluorescently labelled MSAP products were diluted 1:10 in nanopure sterile water and 1  
529 µl was combined with 1 µl of ROX/HiDi mix (50 µl ROX plus 1 ml of HiDi formamide,  
530 Applied Biosystems, USA). Samples were heat-denatured at 95°C for 3–5 min and snap-  
531 cooled on ice for 2 min. Samples were fractionated on an ABI PRISM 3100 at 3 kV for 22 s  
532 and at 15 kV for 45 min.

533

# 534 **Analysis of genetic/epigenetic variability during time in culture using MSAP**

535 MSAP profiles were visualized using GeneMapper Software v4 (Applied Biosystems, Foster  
536 City, CA). A qualitative analysis was carried out in which epiloci were scored as “present”  
537 (1) or “absent” (0) to form a presence/absence binary matrix. The selection of MSAP  
538 fragments was limited to allelic sizes between 80 and 585bp to reduce the potential impact of  
539 size homoplasmy (48). Samples were grouped according to the time in culture when they were  
540 collected (1, 2, 3, 4, 5, 6, 7, 8 months and 8 months and inoculation onto *A. thaliana* called  
541 T1, T2, T3, T4, T5, T6, T7 and T7P hereafter). MSAP profile polymorphisms between DNA  
542 samples from different culture time points were considered as *in vitro* culture induced  
543 methylation differences.

544

545 Epigenetic similarity between tested samples based on profiles obtained from primer  
546 combination E2/H1 and both enzymes (*HpaII* and *MspI*) was first visualized using Principal  
547 Coordinate Analysis (PCoA) (49) using GenAlex (v.6.4) (50). We then used Analysis of  
548 Molecular Variance (AMOVA) (51) to evaluate the structure and degree of epigenetic  
549 diversity induced by different times in culture. Pairwise PhiPT (52) comparisons between  
550 samples restricted with *HpaII* or *MspI* from each time point and the samples after the first  
551 passage (2 months in culture, T1) were used to infer their overall level of divergence in DNA  
552 methylation with time in culture (i.e., the lower the PhiPT value between samples T1  
553 restricted using *HpaII* or *MspI* the smaller the differentiation induced by culture and the same  
554 samples). AMOVA was subsequently calculated using GenAlex (v.6.5) to test the  
555 significance of PhiPT between populations (52), with the probability of non-differentiation  
556 (PhiPT=0) being estimated over 9,999 random permutations.

557

558 Mantle test analysis was used to estimate the correlation between the calculated pairwise  
559 genetic/epigenetic distances and the difference in virulence between culture time points. The  
560 level of significance was assigned estimated over 9,999 random permutations tests, as  
561 implemented in Genalex v6.5.

562

### 563 **Methylation analysis by bisulphite sequencing**

564 DNA from 9 biological replicates from culture of two different ages (1, 8 months) and from 9  
565 replicates of tissue recovered from samples culture for eight months and the inoculated onto  
566 an *A. thaliana* plant were randomly selected for sequencing. Biological replicates were used  
567 to generate 3 pooled samples per culture age. Bisulphite treatment was performed  
568 independently from 50ng of genomic DNA of each pooled sample using the EZ DNA  
569 methylation-Gold™ Kit (Zymo Research) according to the manufacturers' instructions  
570 adjusting the final column purification elution volume to 10 µl. Following Bisulphite  
571 treatment, recovered DNA from each pool was used to estimate yield using a NanoDrop 100  
572 spectrophotometer with the RNA setting. The remaining bisulphite treated sample were then  
573 used to create a sequencing library using the EpiGnome™ Methyl-Seq Kit (Epicentre)  
574 according to manufacturer's instructions and using EpiGnome™ Index PCR Primers (4-12).

575 In order to provide a reference draft sequence for the alignment of the bisulphite treated DNA  
576 and to detect any culture induced genetic variability, 10 ng of native (non-bisulphite treated)  
577 DNA extracted from 3 independent cultures from two time points (1 month (T1) and 8 month  
578 (T8)) were pooled by time point, sequenced and compared to the *B. cinerea* B05.10 genome  
579 sequence. Sequencing libraries were prepared using the EpiGnome™ Methyl-Seq Kit



(Epicentre) according to manufacturer's instructions. Native DNA libraries were uniquely indexed using EpiGnome™ Index PCR Primers (Epicentre) (1-3).

Library yield was determined by Qubit dsDNA High Sensitivity Assay Kit. Agilent 2100 Bioanalyzer High-Sensitivity DNA Chip was used to assess library quality and determine average insert size. Libraries were then pooled and sequenced on Illumina HiSeq 2000 (Illumina Inc., San Diego, CA) using 100bp paired end V3 chemistry by QBI Centre for Brain Genomics.

# **Sequence analysis and differential methylation analysis**

Obtained sequencing reads were trimmed to remove adaptors using *TrimGalore!* ([http://www.bioinformatics.babraham.ac.uk/projects/trim\\_galore](http://www.bioinformatics.babraham.ac.uk/projects/trim_galore)) and *Cutadapt* (53). Whole genome re-sequencing reads were aligned to the published genome from *B. cinerea* B05.10 (Broad Institute's *B. cinerea* Sequencing Project; <https://www.broadinstitute.org/scientific-community/science/projects/fungal-genome-initiative/botrytis-cinerea-genome-project>) using *bowtie2* (54) and variants were called using *freebayes* (55). Variant categories were analysed using *CooVar* (56), *bedtools* (57) and custom scripts. Bisulfite treated libraries were mapped using Bismark (Krueger and Andrews, 2011) and *bowtie2*, duplicates removed and methylation calls were extracted using *samtools* (58) and in-house scripts. Bisulfite sequencing efficiency was calculated by aligning reads to the *B. cinerea* mitochondrial genome scaffold (B05.10) and identifying non-bisulfite converted bases. Differentially methylated regions were called using a sliding window approach described in *swDMR* (<https://code.google.com/p/swdmr/>) using and Kruskal-Wallis (3 sample) statistical tests.

## Author contributions:

J.B. did sequence data analysis and helped drafting the manuscript. A.S. cultured the *Botrytis* samples and performed the virulence analysis. A.A. undertook the estimations of *in planta* fungal develop using qPCR. M.W. and L.A.J.M. helped to conceive the study and drafting the manuscript. C.M.R.L. conceived the study, carried out all nucleic acid extractions, performed and analysed the MSAPs, performed and assisted analysing the native and bisulfite treated DNA sequencing and wrote the manuscript. All authors have read and approved the final manuscript.

## Bibliography

1. Fournier E, Gladieux P, Giraud T. The “Dr Jekyll and Mr Hyde fungus”: noble rot versus gray mold symptoms of *Botrytis cinerea* on grapes. *Evol Appl*. 2013 Sep;6(6):960–969.
2. Weiberg A, Wang M, Lin FM, Zhao H, Zhang Z, Kaloshian I, et al. Fungal small RNAs suppress plant immunity by hijacking host RNA interference pathways. *Science*. 2013 Oct 4;342(6154):118–123.
3. Martinez F, Dubos B, Fermaud M. The Role of Saprotrophy and Virulence in the Population Dynamics of *Botrytis cinerea* in Vineyards. *Phytopathology*. 2005 Jun;95(6):692–700.
4. Pathirana R, Cheah LH, Carimi F, Carra A. Low temperature stored in cryobank® maintains pathogenicity in grapevine. *cryoletters*. 2009; 30(1):84.
5. Butt T, Wang C, Shah F, Hall R. DEGENERATION OF ENTOMOGENOUS FUNGI. In: EILENBERG J, HOKKANEN H, editors. *An Ecological and Societal Approach to Biological Control*. Dordrecht: Springer Netherlands; 2006. p. 213–226.
6. Castro M, Kramer K, Valdivia L, Ortiz S, Castillo A. A double-stranded RNA mycovirus confers hypovirulence-associated traits to *Botrytis cinerea*. *FEMS Microbiol Lett*. 2003 Nov 7;228(1):87–91.
7. Chu YM, Jeon JJ, Yea SJ, Kim YH, Yun SH, Lee YW, et al. Double-stranded RNA mycovirus from *Fusarium graminearum*. *Appl Environ Microbiol*. 2002 May;68(5):2529–2534.

- 634 8. Hatta R, Ito K, Hosaki Y, Tanaka T, Tanaka A, Yamamoto M, et al. A conditionally  
635 dispensable chromosome controls host-specific pathogenicity in the fungal plant  
636 pathogen *Alternaria alternata*. *Genetics*. 2002 May;161(1):59–70.
- 637 9. Akamatsu H, Taga M, Kodama M, Johnson R, Otani H, Kohmoto K. Molecular  
638 karyotypes for *Alternaria* plant pathogens known to produce host-specific toxins. *Curr*  
639 *Genet*. 1999 Jul;35(6):647–656.
- 640 10. Kelly SA, Panhuis TM, Stoeckl AM. Phenotypic plasticity: molecular mechanisms and  
641 adaptive significance. *Compr Physiol*. 2012 Apr;2(2):1417–1439.
- 642 11. Waddington C. Canalization of Development and the Inheritance of Acquired  
643 Characters. *Nature*. 1942 Nov 14;150(3811):563–565.
- 644 12. Tricker PJ, Gibbings JG, Rodríguez López CM, Hadley P, Wilkinson MJ. Low relative  
645 humidity triggers RNA-directed de novo DNA methylation and suppression of genes  
646 controlling stomatal development. *J Exp Bot*. 2012 Jun;63(10):3799–3813.
- 647 13. Geyer KK, Rodríguez López CM, Chalmers IW, Munshi SE, Truscott M, Heald J, et al.  
648 Cytosine methylation regulates oviposition in the pathogenic blood fluke *Schistosoma*  
649 *mansoni*. *Nat Commun*. 2011 Aug 9;2:424.
- 650 14. Bird A. Perceptions of epigenetics. *Nature*. 2007 May 24;447(7143):396–398.
- 651 15. Rodríguez López CM, Wilkinson MJ. Epi-fingerprinting and epi-interventions for  
652 improved crop production and food quality. *Front Plant Sci*. 2015 Jun 5;6:397.
- 653 16. Su Z, Han L, Zhao Z. Conservation and divergence of DNA methylation in eukaryotes:  
654 new insights from single base-resolution DNA methylomes. *Epigenetics*. 2011 Feb  
655 1;6(2):134–140.
- 656 17. He XJ, Chen T, Zhu JK. Regulation and function of DNA methylation in plants and  
657 animals. *Cell Res*. 2011 Mar;21(3):442–465.
- 658 18. Jupe ER, Magill JM, Magill CW. Stage-specific DNA methylation in a fungal plant  
659 pathogen. *J Bacteriol*. 1986 Feb;165(2):420–423.
- 660 19. Jeon J, Choi J, Lee GW, Park SY, Huh A, Dean RA, et al. Genome-wide profiling of  
661 DNA methylation provides insights into epigenetic regulation of fungal development in  
662 a plant pathogenic fungus, *Magnaporthe oryzae*. *Sci Rep*. 2015 Feb 24;5:8567.
- 663 20. Armaleo D, Miao V. Symbiosis and DNA methylation in the *Cladonia* lichen fungus.  
664 *Symbiosis*. 1999;26(2):143 – 163.
- 665 21. Zemach A, McDaniel IE, Silva P, Zilberman D. Genome-wide evolutionary analysis of  
666 eukaryotic DNA methylation. *Science*. 2010 May 14;328(5980):916–919.
- 667 22. Boyko A, Kovalchuk I. Genetic and epigenetic effects of plant-pathogen interactions:  
668 an evolutionary perspective. *Mol Plant*. 2011 Nov;4(6):1014–1023.

23. Reyna-López GE, Simpson J, Ruiz-Herrera J. Differences in DNA methylation patterns are detectable during the dimorphic transition of fungi by amplification of restriction polymorphisms. *Mol Gen Genet.* 1997 Feb 27;253(6):703–710.
24. Gachon C, Saindrenan P. Real-time PCR monitoring of fungal development in *Arabidopsis thaliana* infected by *Alternaria brassicicola* and *Botrytis cinerea*. *Plant Physiol Biochem.* 2004 May;42(5):367–371.
25. Jeon J, Choi J, Lee GW, Dean RA, Lee YH. Experimental evolution reveals genome-wide spectrum and dynamics of mutations in the rice blast fungus, *Magnaporthe oryzae*. *PLoS ONE.* 2013 May 31;8(5):e65416.
26. Amselem J, Cuomo CA, van Kan JA, Viaud M, Benito EP, Couloux A, et al. Genomic analysis of the necrotrophic fungal pathogens *Sclerotinia sclerotiorum* and *Botrytis cinerea*. *PLoS Genet.* 2011 Aug 18;7(8):e1002230.
27. Choquer M, Fournier E, Kunz C, Levis C, Pradier JM, Simon A, et al. *Botrytis cinerea* virulence factors: new insights into a necrotrophic and polyphageous pathogen. *FEMS Microbiol Lett.* 2007 Dec;277(1):1–10.
28. Blanco-Ulate B, Morales-Cruz A, Amrine KC, Labavitch JM, Powell AL, Cantu D. Genome-wide transcriptional profiling of *Botrytis cinerea* genes targeting plant cell walls during infections of different hosts. *Front Plant Sci.* 2014 Sep 3;5:435.
29. Rodríguez López CM, Wetten AC, Wilkinson MJ. Progressive erosion of genetic and epigenetic variation in callus-derived cocoa (*Theobroma cacao*) plants. *New Phytol.* 2010 Jun;186(4):856–868.
30. Dahmen H, Staub T, Schwinn FJ. Technique for Long-Term Preservation of Phytopathogenic Fungi in Liquid Nitrogen. *Phytopathology.* 1983;73(2):241.
31. Lombard V, Golaconda Ramulu H, Drula E, Coutinho PM, Henrissat B. The carbohydrate-active enzymes database (CAZy) in 2013. *Nucleic Acids Res.* 2014 Jan;42(Database issue):D490–D495.
32. Feng S, Cokus SJ, Zhang X, Chen PY, Bostick M, Goll MG, et al. Conservation and divergence of methylation patterning in plants and animals. *Proc Natl Acad Sci U S A.* 2010 May 11;107(19):8689–8694.
33. Jung M, Pfeifer GP. Aging and DNA methylation. *BMC Biol.* 2015 Jan 31;13:7.
34. Gómez-Díaz E, Jordà M, Peinado MA, Rivero A. Epigenetics of host-pathogen interactions: the road ahead and the road behind. *PLoS Pathog.* 2012 Nov 29;8(11):e1003007.
35. Cheeseman K, Weitzman JB. Host-parasite interactions: an intimate epigenetic relationship. *Cell Microbiol.* 2015 Aug;17(8):1121–1132.

36. Mishra PK, Baum M, Carbon J. DNA methylation regulates phenotype-dependent transcriptional activity in *Candida albicans*. *Proc Natl Acad Sci U S A*. 2011 Jul 19;108(29):11965–11970.
37. Hervouet E, Cheray M, Vallette FM, Cartron PF. DNA methylation and apoptosis resistance in cancer cells. *Cells*. 2013 Jul 18;2(3):545–573.
38. Belden WJ, Lewis ZA, Selker EU, Loros JJ, Dunlap JC. CHD1 remodels chromatin and influences transient DNA methylation at the clock gene frequency. *PLoS Genet*. 2011 Jul 21;7(7):e1002166.
39. O’Dea RE, Noble DWA, Johnson SL, Hesselson D, Nakagawa S. The role of non-genetic inheritance in evolutionary rescue: epigenetic buffering, heritable bet hedging and epigenetic traps. *Environmental epigenetics*. 2016;2(1):dvv014.
40. Consuegra del Olmo S, Rodriguez Lopez CM. Epigenetic-induced alterations in sex-ratios in response to climate change: an epigenetic trap? *BioEssays*.
41. Thomma BP, Eggermont K, Tierens KF, Broekaert WF. Requirement of functional ethylene-insensitive 2 gene for efficient resistance of *Arabidopsis* to infection by *Botrytis cinerea*. *Plant Physiol*. 1999 Dec;121(4):1093–1102.
42. Johnson H, Lloyd A, Mur L, Smith A, Causton D. The application of MANOVA to analyse *Arabidopsis thaliana* metabolomic data from factorially designed experiments. *Metabolomics*. 2007 Nov 7;3(4):517–530.
43. Boyes DC, Zayed AM, Ascenzi R, McCaskill AJ, Hoffman NE, Davis KR, et al. Growth stage-based phenotypic analysis of *Arabidopsis*: a model for high throughput functional genomics in plants. *Plant Cell*. 2001 Jul;13(7):1499–1510.
44. Johnson H, Broadhurst D, Goodacre R, Smith A. Metabolic fingerprinting of salt-stressed tomatoes. *Phytochemistry*. 2003 Mar;62(6):919–928.
45. Lloyd AJ, William Allwood J, Winder CL, Dunn WB, Heald JK, Cristescu SM, et al. Metabolomic approaches reveal that cell wall modifications play a major role in ethylene-mediated resistance against *Botrytis cinerea*. *Plant J*. 2011 Sep;67(5):852–868.
46. Róis AS, Rodríguez López CM, Cortinhas A, Erben M, Espírito-Santo D, Wilkinson MJ, et al. Epigenetic rather than genetic factors may explain phenotypic divergence between coastal populations of diploid and tetraploid *Limonium* spp. (Plumbaginaceae) in Portugal. *BMC Plant Biol*. 2013 Dec 6;13:205.
47. Rodríguez López C, Morán P, Lago F, Espiñeira M, Beckmann M, Consuegra S. Detection and quantification of tissue of origin in salmon and veal products using methylation sensitive AFLPs. *Food Chem*. 2012 Apr;131(4):1493–1498.

48. Caballero A, Quesada H, Rolán-Alvarez E. Impact of amplified fragment length polymorphism size homoplasy on the estimation of population genetic diversity and the detection of selective loci. *Genetics*. 2008 May;179(1):539–554.
49. Gower JC. Some Distance Properties of Latent Root and Vector Methods Used in Multivariate Analysis. *Biometrika*. 1966 Dec; 53(3/4):325–338
50. Peakall R, Smouse PE. GenAEx 6.5: genetic analysis in Excel. Population genetic software for teaching and research--an update. *Bioinformatics*. 2012 Oct 1;28(19):2537–2539.
51. Excoffier L, Smouse PE, Quattro JM. Analysis of molecular variance inferred from metric distances among DNA haplotypes: application to human mitochondrial DNA restriction data. *Genetics*. 1992 Jun;131(2):479–491.
52. Michalakis Y, Excoffier L. A generic estimation of population subdivision using distances between alleles with special reference for microsatellite loci. *Genetics*. 1996 Mar;142(3):1061–1064.
53. Martin M. Cutadapt removes adapter sequences from high-throughput sequencing reads. *EMBnet.journal*. 2011 May 2;17(1):10.
54. Langmead B, Salzberg SL. Fast gapped-read alignment with Bowtie 2. *Nat Methods*. 2012 Apr;9(4):357–359.
55. Garrison E, Marth G. Haplotype-based variant detection from short-read sequencing. 2012 Jul 17; Available from: <https://arxiv.org/abs/1207.3907>
56. Vergara IA, Frech C, Chen N. Coovar: co-occurring variant analyzer. *BMC Res Notes*. 2012 Nov 1;5:615.
57. Quinlan AR, Hall IM. BEDTools: a flexible suite of utilities for comparing genomic features. *Bioinformatics*. 2010 Mar 15;26(6):841–842.
58. Li H, Handsaker B, Wysoker A, Fennell T, Ruan J, Homer N, et al. The Sequence Alignment/Map format and SAMtools. *Bioinformatics*. 2009 Aug 15;25(16):2078–2079.





resistant symptoms (necrosis limited to inoculation site) were given negative scores. Asterisk symbols under the horizontal axis indicate significant differences (\* (T-Test;  $P < 0.05$ ) and \*\* (T-Test;  $P < 0.01$ )) between T0 and the time point over the asterisk. Asterisk symbols over the horizontal axis indicate significant differences (\*\* (T-Test;  $P < 0.01$ )) between T8P and the time point under the asterisk. (c) Detection of *in planta* *B. cinerea* hyphal mass in *A. thaliana* Col-0 by qPCR as described by Gachon and Saindrenan, 2004.



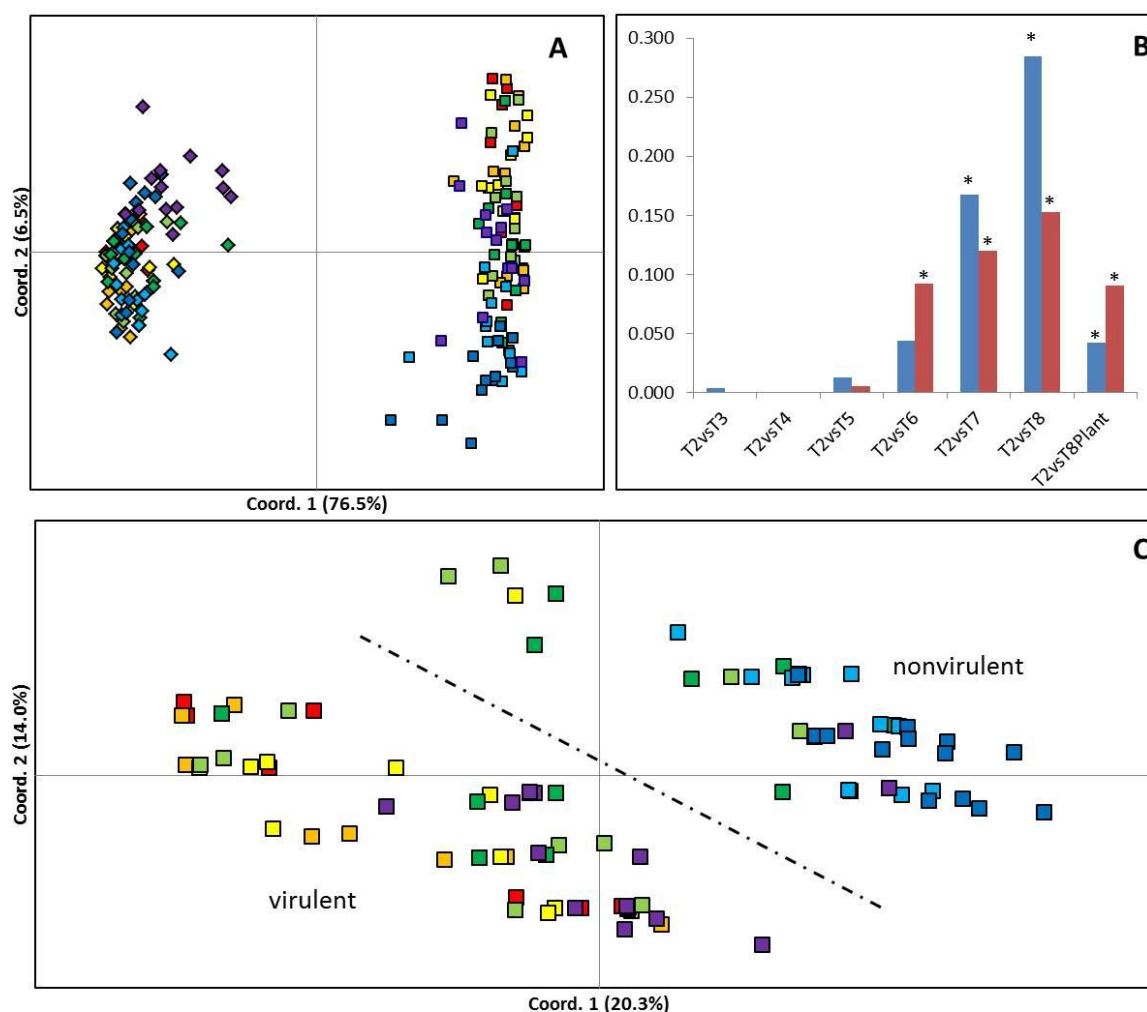

**Figure 2: Effect of time in culture on genetic/epigenetic instability.** (a, c) Principal coordinate diagrams based on the Euclidian analysis of methylation-sensitive amplified polymorphisms (MSAP) using enzymes *HpaII* (squares) and *MspI* (romboids) (a) and using enzyme *HpaII* distances (c). 14 replicates from each time point are represented as red (T2: 2 months in culture), orange (T3: 3 months in culture), yellow (T4: 4 months in culture), light green (T5: 5 months in culture), dark green (T6: 6 months in culture), light blue (T7: 7 months in culture), dark blue (T8: 8 months in culture), and purple (T8P: 8 months+plant). The dashed line separates samples with higher average levels of virulence from those of lower average levels of virulence. (b) Calculated Pairwise PhiPT (Michalakis & Excoffier, 1996) comparisons between samples restricted with *HpaII* (Blue) or *MspI* (Red) from each

800 time point and the samples after the second passage (2 months in culture). \* Indicates  
801 significantly different PhiPT values between T2 and the time point under the asterix based on  
802 10,000 permutations ( $P = 0.05$ ).

803  
804

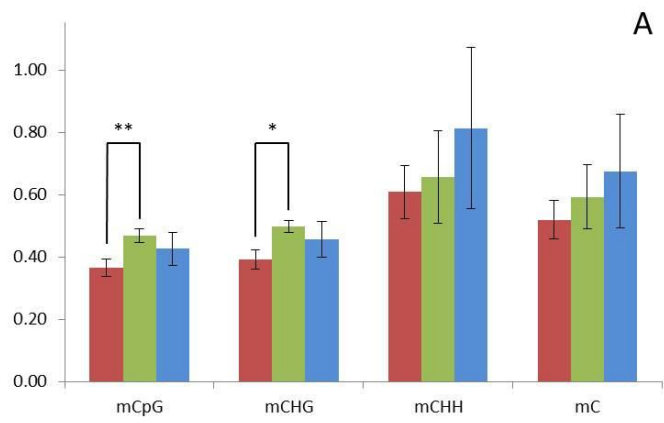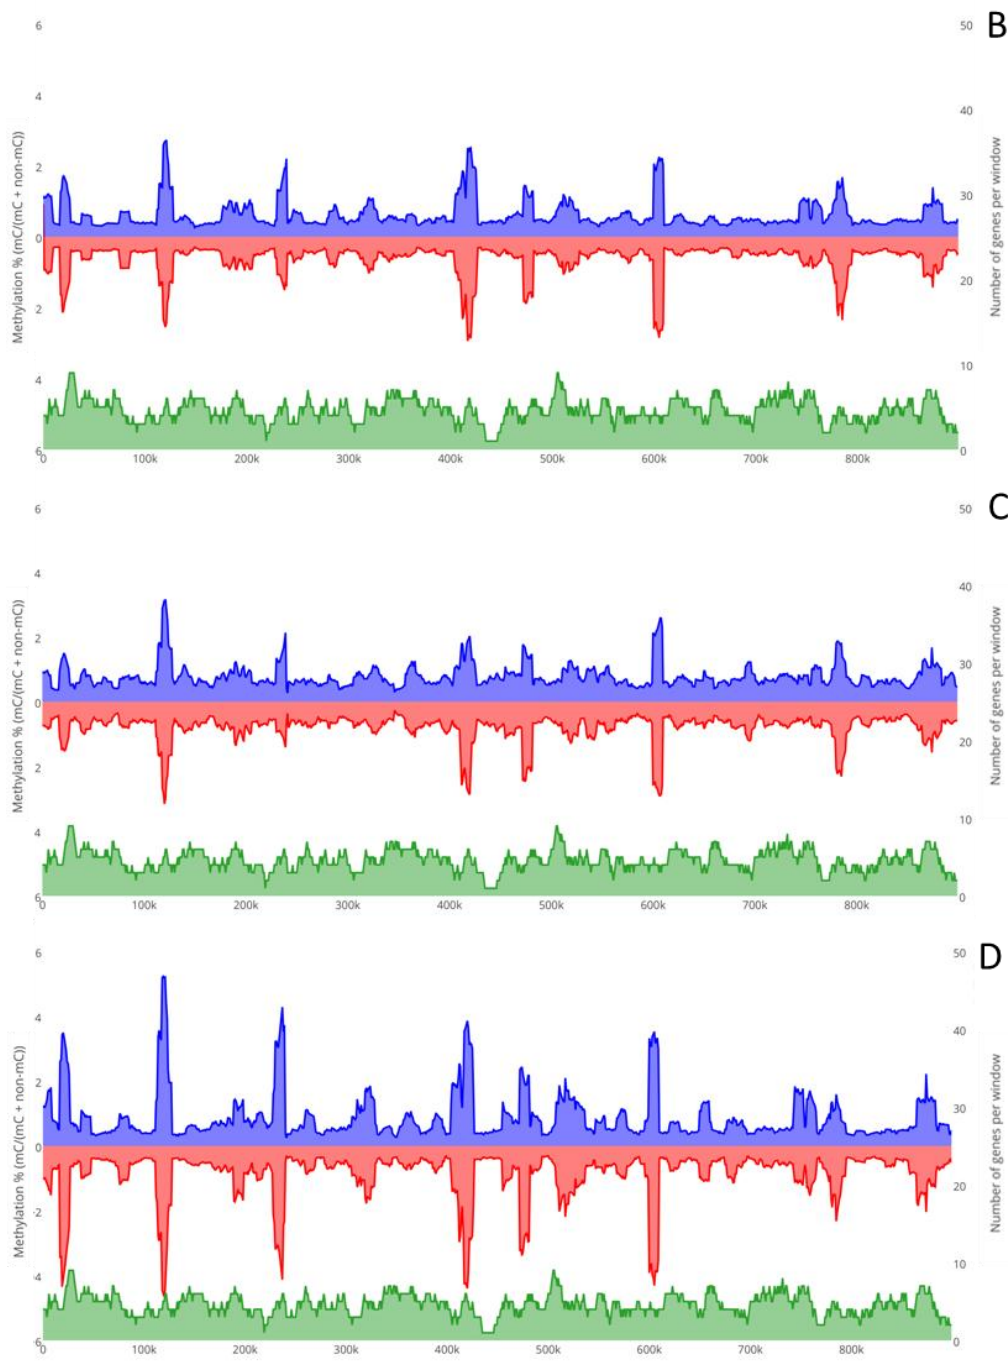

**Figure 3. Global changes on genomic distribution and levels of DNA methylation in B.**

**cinerea.** **A)** Global average proportions of mCs (number of mCs/total Cs) at each time point (T1, red; T8, green and T8P, blue). **B-D)** Methylcytosines (mCs) density from each strand (blue, positive and red, negative strand) across supercontig 1.1 at each time point (**B**=T1; **C**=T8 and **D**=T8P) was calculated and plotted as the proportion of methylated cytosines (mCs/total Cs) in each 10kb window.

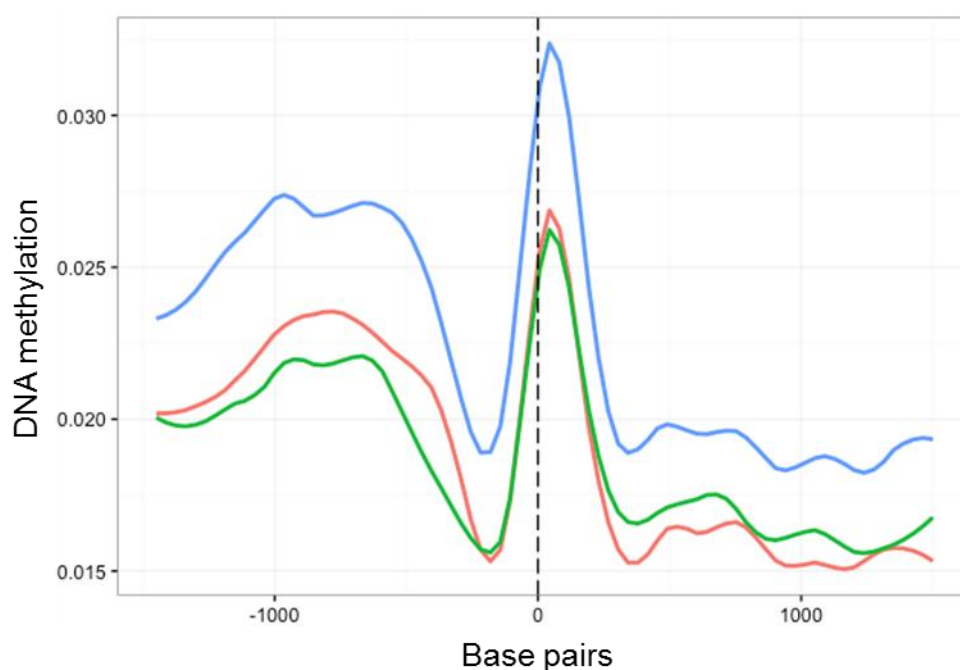

**Figure 4: Methylation density across transcription start sites (TSS) regions of all *B. cinerea* selected genes.** Methylation level (Vertical axis) at each time point (T1, red; T8, green and T8P, blue) was identified as the proportion of methylated cytosines against all cytosines in 30bp windows 1.5kb before and after the transcription start site.

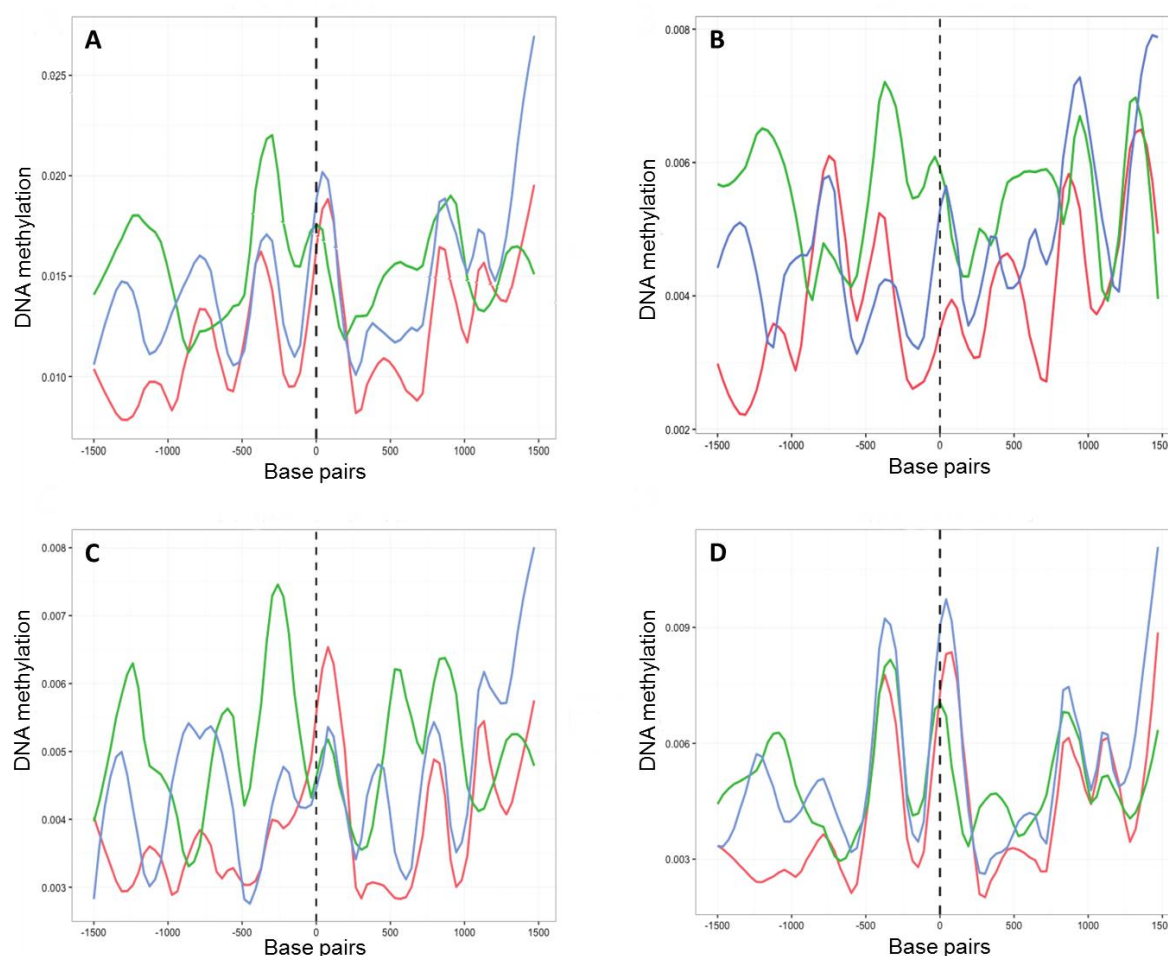

**Figure 5: Methylation density across transcription start sites (TSS) found in 131 genes associated to polysaccharide degradation in *B. cinerea* (27).** Methylation level (Vertical axis) at each time point (T1, red; T8, green and T8P, blue) was identified as the proportion of methylated cytosines against all cytosines in 30bp windows 1.5kb before and after the transcription start site (TSS) (Horizontal axis). **A)** Methylation level for all mCs; **B)** Methylation level for CpG context; **C)** Methylation level for CpHpG context and **D)** Methylation level for CpHpH context.

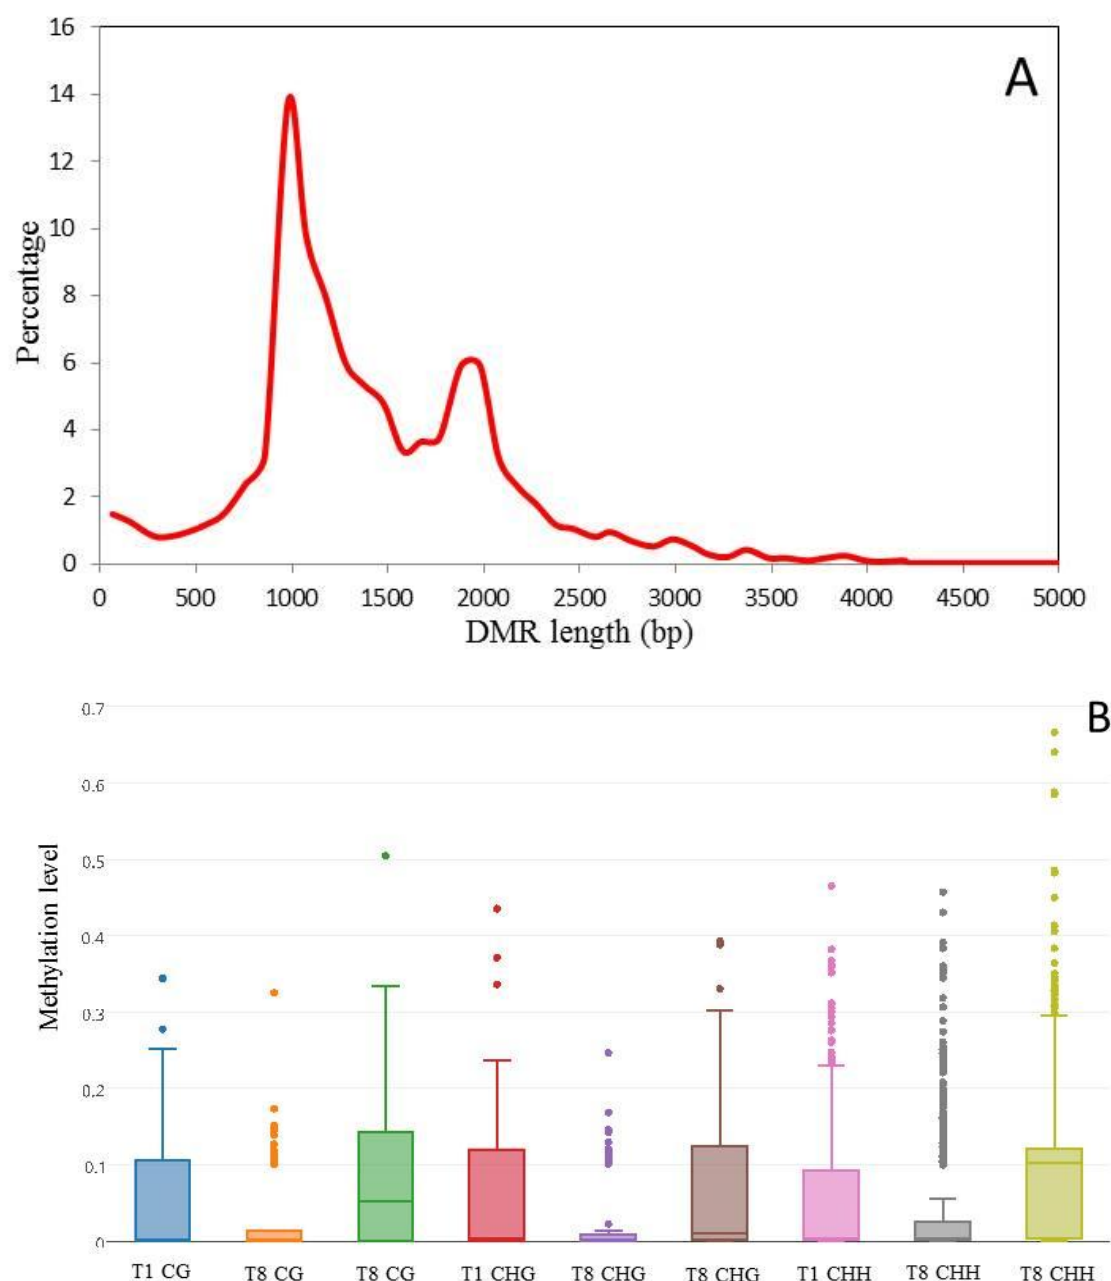

**Figure 6: Analysis of *in vitro* culture induced DMRs in *Botrytis cinerea*.** (a) Length distribution of *in vitro* culture induced DMRs in *Botrytis cinerea*. DMRs (i.e., regions presenting significantly different methylation levels between one sample and the other two samples ( $FDR < 0.01$ )) were determined using a three sample Kruskal-Wallis test. Methylation levels were analysed by sliding window analysis using swDMR. DMRs were determined for all cytosines. (b) Methylation level distribution in *in vitro* induced DMRs. Boxplot of 3 sample sliding window differential methylation analysis using swDMR. The boxplots shows

840 the distribution of each methylation in each context (CG, CHG and CHH) at three time points  
841 (T1, T8 and T8P), circles indicate DMRs with outlier levels of methylation.  
842



**Table 1: *Botrytis cinerea* virulence genes with known function overlapping with *in vitro* culture induced DMRs.** Columns **Gene Variant** and **Gene/DMR overlap** indicate the number (#) and percentage (%) of genes in each functional group with a genetic variant or overlapping with a Differentially Methylated Region respectively. Column **DMR Type** indicate how methylation levels changed when comparing all three samples (T1, T8 and T8P). DMRs were grouped according to their changing patterns into recovery (T1=T8P) and non-recovery (T1< > T8P). Two subgroups were found for recovery (T1=T8P < T8 (Type 0) and T1=T8P > T8 (Type 2)) and non-recovery (T1>T8=T8P (Type 1a) and T1=T8<T8P (Type 1b)). Virul. s.l. indicates virulence genes in abroad sense and include genes associated to: Appressorium formation, virulence on a strict sense and CAZyme genes. (1,2)(26,27)

| Gene Function                     |                | Total | Gene Variant |      | Gene/DMR overlap |      | DMR Type |     |           |     | Reference |
|-----------------------------------|----------------|-------|--------------|------|------------------|------|----------|-----|-----------|-----|-----------|
|                                   |                |       | #G/D         | %G/D | #G/D             | %G/D | Recovery |     | Non-recov |     |           |
|                                   |                |       |              |      |                  |      | 0        | 2   | 1a        | 1b  |           |
| Housekeeping                      |                | 5     | -            | -    | -                | -    | -        | -   | -         | -   | (26)      |
| Apoptosis                         |                | 10    | 2            | 20   | 4                | 40.0 | 3        | 1   | -         | -   | (26)      |
| Conidiation                       |                | 16    | -            | -    | 6                | 37.5 | 1        | 2   | -         | 3   | (26)      |
| Mating and fruit body development |                | 32    | 6            | 18.8 | 6                | 18.7 | 1        | 4   | 1         | 1   | (26)      |
| Secondary metabolism              |                | 51    | 4            | 7.8  | 14               | 27.5 | 9        | 3   | 2         | 3   | (26)      |
| Signalling pathways               |                | 176   | 6            | 3.4  | 54               | 30.7 | 12       | 17  | 7         | 20  | (26)      |
| Sclerotium formation              |                | 249   | 7            | 2.8  | 67               | 26.9 | 26       | 31  | 10        | 13  | (26)      |
| Virul. s.l.                       | Appressorium   | 12    | 2            | 16.7 | 3                | 25.0 | 1        | -   | -         | 3   | (26)      |
|                                   | Virulence s.s. | 17    | 1            | 5.9  | 4                | 23.5 | 1        | 1   | 1         | 2   | (27)      |
|                                   | CAZyme genes   | 1155  | 50           | 4.3  | 320              | 27.7 | 112      | 132 | 45        | 99  | (28)      |
| Total                             |                | 1577  | 68           | 4.3  | 478              | 30.3 | 166      | 191 | 66        | 144 |           |

**Table 2: Number of Differentially Methylated Regions (DMRs) between T1, T8 and T8P samples.** DRMs (i.e., regions presenting significantly different methylation levels between one sample and the other two samples (FDR<0.01)) were determined using a three sample Kruskal-Wallis test. Methylation levels were analysed by sliding window analysis using swDMR. DMRs were determined for all cytosines and for three methylation contexts. DMRs were grouped according to their changing patterns into recovery (T1=T8P) and non-recovery (T1< > T8P). Two subgroups were found for recovery (T1=T8P < T8 (Type 0) and T1=T8P > T8 (Type 2)) and non-recovery (T1>T8=T8P (Type 1a) and T1=T8<T8P (Type 1b)). Percentage of the total DMRs for each pattern type/sequence context is shown in parenthesis.

|       | Total | Recovery (%) |              | Total recovery (%) | No recovery                |                         |
|-------|-------|--------------|--------------|--------------------|----------------------------|-------------------------|
|       |       | Type 0       | Type 2       |                    | In vitro induced (Type 1a) | Plant induced (Type 1b) |
| mC    | 2822  | 757 (26.82)  | 860 (30.47)  | 1617 (57.30)       | 452 (16.02)                | 753 (26.68)             |
| CG    | 70    | 17 (24.29)   | 15 (21.43)   | 32 (45.71)         | 14 (20.00)                 | 24 (34.29)              |
| CHG   | 82    | 14 (17.07)   | 30 (36.59)   | 44 (53.66)         | 15 (18.29)                 | 23 (28.05)              |
| CHH   | 1248  | 303 (24.28)  | 490 (39.26)  | 793 (63.54)        | 137 (10.98))               | 318 (25.48)             |
| Total | 4222  | 1395 (33.04) | 1091 (25.84) | 2486(58.88)        | 618 (14.64)                | 1118 (26.48)            |

**Table 3: *Botrytis cinerea* in vitro induced Differentially Methylated Regions overlapping with genes.** DRMs overlapping with genes (i.e., regions presenting significantly different methylation levels between one sample and the other two samples (FDR<0.01)) were determined using a three sample Kruskal-Wallis test. Methylation levels were analyzed by sliding window analysis using swDMR. DMRs were determined for all cytosines and for three methylation contexts. DMRs were grouped according to the genic region they overlapped with (i.e, Promoter, promoter and Gene body, promoter, Gene body and 3'UTR, gene body and 3'UTR and gene body). (\*\*) Percentage of the total DMRs overlapping with each particular genic region. (\*) Percentage of the total number of genes showing a methylation recovery pattern.

|     | Total genes         | Promoter, Gene body and 3'UTR (*) | Promoter only (*) | Promoter and Gene body (*) | Gene body and 3'UTR (*) | Gene body (*) |
|-----|---------------------|-----------------------------------|-------------------|----------------------------|-------------------------|---------------|
| mC  | 3055                | 626 (20.49)                       | 61 (2.00)         | 1022 (33.45)               | 923 (30.21)             | 423 (13.85)   |
| CG  | 68                  | 3 (4.41)                          | 0 (0.00)          | 24 (35.29)                 | 21 (30.88)              | 20 (29.41)    |
| CHG | 84                  | 8 (9.52)                          | 0 (0.00)          | 29 (34.52)                 | 27 (32.14)              | 20 (23.81)    |
| CHH | 1339                | 248 (18.52)                       | 32 (2.39)         | 443 (33.08)                | 413 (30.84)             | 203 (15.16)   |
|     | Recovery genes (**) |                                   |                   |                            |                         |               |
| mC  | 1713 (56.07)        | 345 (20.14)                       | 43 (2.51)         | 545 (31.82)                | 537 (31.35)             | 243 (14.19)   |
| CG  | 32 (47.06)          | 2 (6.25)                          | 0 (0.00)          | 11 (34.38)                 | 9 (28.13)               | 10 (31.25)    |
| CHG | 46 (54.76)          | 4 (8.70)                          | 1 (2.17)          | 13 (28.26)                 | 16 (34.78)              | 12 (26.09)    |
| CHH | 863 (64.45)         | 175 (20.28)                       | 21 (2.43)         | 286 (33.14)                | 252 (29.20)             | 129 (14.95)   |

## 882      **Supplementary Tables**

883      **Supplementary Table 2:** Average coverage statistics for Whole Genome Bisulfite  
 884      Sequenced samples. Average measurements were obtained from three replicates at each time  
 885      point. Sequencing reads from all samples were mapped to *B. ciniera* B05.10 genome using  
 886      Bismark/Bowtie2.

| Sample | Mean Coverage | Std dev | Cytosine coverage | Cytosine coverage (>4x) | mC (>1x) |
|--------|---------------|---------|-------------------|-------------------------|----------|
| T1     | 54.9939       | 20.3428 | 92.55%            | 87.65%                  | 10.99%   |
| T8     | 33.1991       | 13.868  | 91.50%            | 81.07%                  | 9.14%    |
| T8P    | 45.0209       | 17.0144 | 93.42%            | 86.67%                  | 10.63%   |

888

889

**Supplementary Table 3:** Genome mapping statistics from 9 bisulfite converted *Botrytis* samples. Sequencing reads from all samples were mapped to *B. cinerea* B05.10 genome using Bismark/Bowtie2

| Samples | Total bp    | % Map. Effic | Total methylated C's |           |            | Total non-methylated C's |              |              | % methylation |      |      | % mC |
|---------|-------------|--------------|----------------------|-----------|------------|--------------------------|--------------|--------------|---------------|------|------|------|
|         |             |              | CpG                  | CHG       | CHH        | CpG                      | CHG          | CHH          | CpG           | CHG  | CHH  |      |
| T1BS1   | 26382612    | 67.6         | 477254               | 438983    | 2499975    | 130600424                | 111869938    | 391807290    | 0.36          | 0.39 | 0.63 | 0.54 |
| T1BS2   | 34048060    | 62.9         | 526341               | 485477    | 2494454    | 155155501                | 134341879    | 485255169    | 0.34          | 0.36 | 0.51 | 0.45 |
| T1BS3   | 17347608    | 61.1         | 306505               | 279816    | 1575956    | 77226256                 | 66054702     | 232502707    | 0.40          | 0.42 | 0.67 | 0.57 |
| AvT1    | 25926093.33 | 63.87        | 436700.00            | 401425.33 | 2190128.33 | 120994060.33             | 104088839.67 | 369855055.33 | 0.36          | 0.38 | 0.59 | 0.52 |
| T8BS1   | 18543427    | 62           | 394348               | 360641    | 1568745    | 83351098                 | 71894819     | 257263175    | 0.47          | 0.50 | 0.61 | 0.56 |
| T8BS2   | 12613134    | 60.7         | 248968               | 229853    | 902624     | 55786373                 | 47759672     | 166229028    | 0.44          | 0.48 | 0.54 | 0.51 |
| T8BS3   | 17117307    | 65.1         | 391446               | 360065    | 2142019    | 79537475                 | 69135859     | 257486354    | 0.49          | 0.52 | 0.83 | 0.71 |
| AvT8    | 16091289.33 | 62.60        | 344920.67            | 316853.00 | 1537796.00 | 72891648.67              | 62930116.67  | 226992852.33 | 0.47          | 0.50 | 0.67 | 0.59 |
| T8PBS1  | 28336888    | 62.3         | 524875               | 487874    | 3561078    | 126943754                | 110309124    | 404488048    | 0.41          | 0.44 | 0.87 | 0.71 |
| T8PBS2  | 18471780    | 66.9         | 435528               | 403984    | 2932991    | 89352607                 | 77332840     | 279892313    | 0.49          | 0.52 | 1.04 | 0.84 |
| T8PBS3  | 14694194    | 54.3         | 220458               | 201667    | 924438     | 57483914                 | 49293008     | 173794940    | 0.38          | 0.41 | 0.53 | 0.48 |
| AvT8P   | 20500954.00 | 61.17        | 393620.33            | 364508.33 | 2472835.67 | 91260091.67              | 78978324.00  | 286058433.67 | 0.43          | 0.46 | 0.86 | 0.68 |

902

903 **Supplementary Table 8:** Primer sequences used for MSAP.

| Oligo name             | Function            | Sequence            |
|------------------------|---------------------|---------------------|
| Ad <i>HpaII/MspI</i>   | Reverse Adaptor     | GACGATGAGTCTAGAA    |
| Ad. <i>HpaII/MspI</i>  | Forward Adaptor     | CGTTCT AGACTCATC    |
| Ad. <i>EcoRI</i>       | Reverse Adaptor     | AATTGGTACGCAGTCTAC  |
| Ad <i>EcoRI</i>        | Forward Adaptor     | CTCGTAGACTGCGTACC   |
| Pre. <i>EcoRI</i>      | Preselective primer | GACTGCGTACCAATTCA   |
| Pre. <i>HpaII/MspI</i> | Preselective primer | GATGAGTCCTGAGCGGC   |
| <i>EcoRI</i> 2         | Selective primer    | GACTGCGTACCAATTCAAC |
| <i>HpaII</i> 2.1       | Selective primer    | GATGAGTCCTGAGCGGCA  |

904

905

906

907

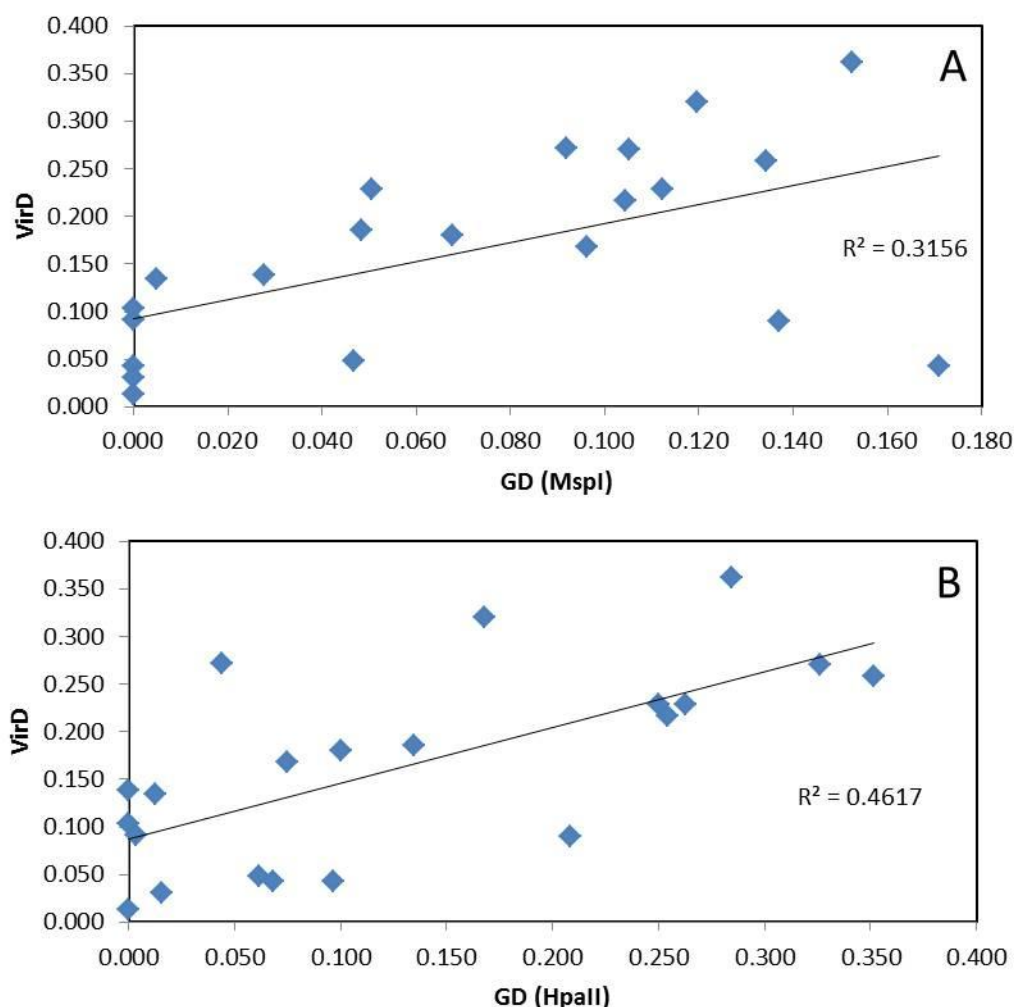

**Figure S1: Correlation between pairwise molecular differentiation and changes in virulence observed during *in vitro* culture of *B. cinerea*.** Correlations were calculated using mantle test analysis on pairwise PhiPT values (**GD**) (generated from MSAP data obtained using MspI (**A**) and HpaII (**B**)) and differences in virulence between culture time points (**VirD**). Analysis using 1000 permutations showed significant correlations (**A**:  $P = 0.005$ ; **B**:  $P = 0.002$ ).





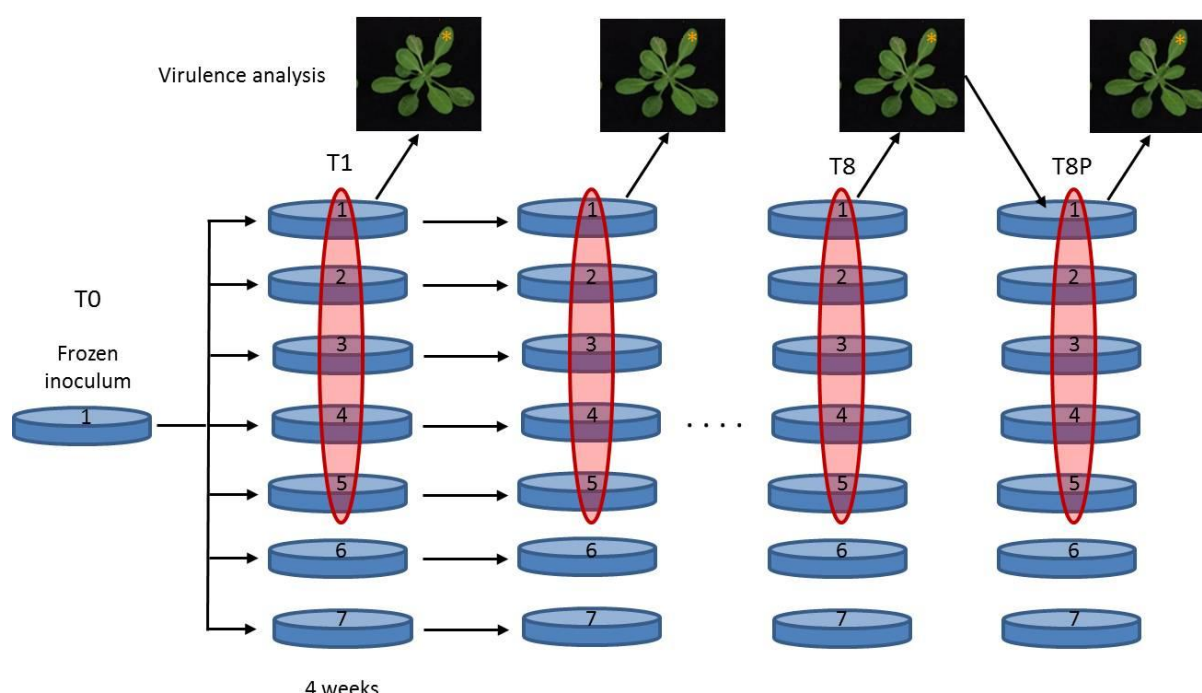

**Figure S2: Schematic representation of experimental design.** Seven replicated *Botrytis cinerea* cultures were initiated from a single frozen inoculum and cultured for 36 weeks. All replicates were subcultured every 4 weeks to fresh culture medium and mycelia were kept for DNA analysis (MSAPs, WGS, and BS-WGS). Conidia from five randomly selected replicates (highlighted in red) at each time point were collected and used for virulence analysis by inoculating five *Arabidopsis thaliana*. Inoculated *A. thaliana* leaves\* at T1, T8 and T8P were collected 72 hours after inoculation for estimation of *in planta* fungal development by quantitative PCR. Conidia from were collected from *A. thaliana* tissue infected with T8 fungus and were re-cultured for a short time to generate conidia to test virulence recovery.
